# Supplementary material
Source: publisher figshare collection journal article supplement (https://karger.figshare.com/ndownloader/files/34443614)
Supplement: Supplementary file 1 [file 34443614]

**Supplementer file**

**The difference of microcirculatory parameters among men and women among different sublingual fields**

TVD_small

| Field | Female | Male | p |
| --- | --- | --- | --- |
| a | 20.6(20.2; 22.0) | 21(20.6; 23.3) | 0.563 |
| b | 24.4(21.6; 24.8) | 22.0(21.5;24.1) | 0.734 |
| c | 21.2(20.1; 22.5) | 23.4(22.5; 24.6) | 0.148 |
| d | 20.3(20.0; 21.5) | 22.1(19.5; 23.4) | 0.772 |

TVD_large

| Field | Female | Male | p |
| --- | --- | --- | --- |
| a | 6.7(6.6;7.4) | 7.7(7.0;8.9) | 0.562 |
| b | 7.3(7.2;8.1) | 7.2(6.6;7.8) | 0.470 |
| c | 7.6(7.4;8.3) | 7.1(6.5;7.5) | 0.192 |
| d | 7.8(7.3;7.9) | 8.2(7.6;8.6) | 0.277 |

FCD

| Field | Female | Male | p |
| --- | --- | --- | --- |
| a | 20.0(19.8;21.5) | 20.0(19.7;22.7) | 0.942 |
| b | 23.8(20.9;24.0) | 21.5(20.6;23.3) | 0.613 |
| c | 20.7(19.6;22.0) | 22.5(21.9;23.6) | 0.294 |
| d | 20.0(19.7;21.2) | 21.3(19.1;22.4) | 0.942 |

Focus

| Field | Female | Male | p |
| --- | --- | --- | --- |
| a | 128(120;137) | 186(146;213) | 0.07 |
| b | 80(80;131) | 181(148;187) | 0.09 |
| c | 96(84;124) | 173(132;207) | 0.06 |
| d | 100(78;145) | 170(130;206) | 0.28 |

Sublingual microcirculatory parameters, including small vessel TVD, large vessel TVD, FCD, and focus depth, were analyzed in all fields of men and women. Values were displayed as the median (before parenthesis) and interquartile range (in the parenthesis). No statistical significance was found between the defined sublingual fields for the distribution of small vessel TVD, large vessel TVD, FCD, and focus depth among men and women. TVD, total vessel density; FCD, functional capillary density; mm, millimeter. TVD, Total vessel density; FCD, Functional capillary density; mm, millimeter; µm, micrometer.
